# Supplementary material for: Adamtsl2 deletion results in bronchial fibrillin microfibril accumulation and bronchial epithelial dysplasia – a novel mouse model providing insights into geleophysic dysplasia
Source: Dis Model Mech. 2015 May 1;8(5):487–99. doi: 10.1242/dmm.017046 (PMC4415891; doi:10.1242/dmm.017046)
Supplement: Supplementary Material [file supp_8.5.487_DMM017046.pdf]

**Supplemental Figure S1: Bronchial epithelial cell polarity and integrity is maintained in *Adamtsl2*<sup>-/-</sup> bronchi.** (A-E) Staining for selected markers of bronchial cell differentiation and intracellular compartments is shown in *Adamtsl2*<sup>-/-</sup> (-/-) and WT mice. Comparable smooth muscle actin (SMA, from n = 5 per genotype) (A) and pan-cytokeratin (pCK, from n = 2 per genotype) (B) are indicative of an intact smooth muscle cell layer and epithelial cell identity, respectively, in the bronchi of *Adamtsl2*<sup>-/-</sup> lungs. The occluding vesicles are not positive for lysosomes (Lamp2, from n = 2 per genotype) (C), or the Golgi apparatus marker GM130 (E, green, n = 3 per genotype), but stained for the ER marker KDEL (from n = 3 per genotype) (D). Staining for ciliated cells using  $\beta$ -tubulin (red) shows no differences between WT and *Adamtsl2*<sup>-/-</sup> lungs. (F-I) Markers for spatial relationships of bronchial epithelium show that despite profound epithelial dysplasia in *Adamtsl2*<sup>-/-</sup> bronchi, the overall bronchial epithelial identity and orientation were maintained (from n = 2 per genotype), although *Adamtsl2*<sup>-/-</sup> bronchial epithelium shows reduced staining in H and I. Collagen IV staining indicates an intact basement membrane (F, arrows point to the epithelial/SMC junction), cortical actin, stained with phalloidin-FITC, is distributed apically and laterally in WT and *Adamtsl2*<sup>-/-</sup> bronchial epithelium (G), PKC $\zeta$  mainly stains the luminal side of the bronchial epithelium (H). The zona occludens marker ZO-2, even though weaker in the *Adamtsl2*<sup>-/-</sup> lungs, indicates tight junctions between bronchial epithelial cells (I). Bronchi are outlined with dashed line. Scale bars = 25  $\mu$ m, if not indicated otherwise. WT, wild-type, -/-, *Adamtsl2*<sup>-/-</sup>; B, bronchi; BV, blood vessel.

**Supplemental Figure S2: No alteration in cell proliferation or apoptosis in the bronchial epithelium of *Adamtsl2*<sup>-/-</sup> lungs.** Cell proliferation (top panels) was analyzed by staining with an antibody against phospho-histone H3, which marks proliferating cells (from n = 2 per

genotype). Positive (proliferating) cells are indicated with arrows. Apoptosis (bottom panels) was assessed with TUNEL staining (from n = 2 per genotype). TUNEL positive cells are indicated with arrows. Scale bars = 25  $\mu$ m. B, bronchi.

**Supplemental Figure S3: Immunolocalization of FBN1 in paraffin-embedded lung sections.**

FBN1 predominantly localizes to the blood vessel walls and only a minor amount is found in the bronchial epithelium at E14.5 (from n = 3 per genotype), E17.5 (from n = 3 per genotype), and P0 (from n > 6 per genotype). Nuclei are counterstained with DAPI (blue). Quantification of mean integrated density of fluorescence signal for FBN1 showed no statistically significant difference between the WT and *Adamtsl2*<sup>-/-</sup> lungs. Scale bars = 25  $\mu$ m. B, bronchi; asterisk, blood vessel.

**Supplemental Figure S4: Non-canonical TGF $\beta$ -signaling pathways are not altered in**

***Adamtsl2*<sup>-/-</sup> lungs.** (A) Western blots are shown for pErk1/2 or pp38 and total Erk1 or p38, respectively, using total protein extracted from *Adamtsl2*<sup>-/-</sup> or WT lungs at E17.5 (left, n = 1 for WT, n = 4 for *Adamtsl2*<sup>-/-</sup>; n = 4 for *Adamtsl2*<sup>+/-</sup>) and P0 (right, n = 3 for WT and *Adamtsl2*<sup>-/-</sup>; n = 2 for *Adamtsl2*<sup>+/-</sup>). Equal amounts of protein were loaded and the mean intensity of the pErk1/2 or pp38 bands was quantified using ImageJ and normalized to the amount of total Erk1 or total p38, respectively. (B) Absence of nuclear pSmad2 staining in NAB treated lungs compared to IgG treated lungs is indicative of the efficiency of the NAB for blocking TGF $\beta$  signaling (from n = 2 per genotype). Scale bars = 25  $\mu$ m.

**Supplemental Table S1. Frequencies of genotypes arising from *Adamtsl2*+/- intercrosses<sup>1</sup>**

| Stage                                                           | Genotype            |                        |                        |
|-----------------------------------------------------------------|---------------------|------------------------|------------------------|
|                                                                 | <i>Adamtsl2</i> +/+ | <i>Adamtsl2</i> +/-    | <i>Adamtsl2</i> -/-    |
| E14.5 – E18.5                                                   | 33 (35.1)           | 34 (36.2)              | 27 (28.7)              |
| Postnatal day 0 - 1                                             | 30 (33.3)           | 35 (38.9)              | 25 (27.8) <sup>2</sup> |
| Postnatal day 7                                                 | 60 (37.5)           | 95 (59.4) <sup>4</sup> | 5 (3.1) <sup>3</sup>   |
| Shown are the number of mice (percentage) at the indicated ages |                     |                        |                        |

<sup>1</sup>Numbers are combined from intercrosses arising from *Adamtsl2*+/- mice before and after *Neo* deletion.

<sup>2</sup>8/21 (38.1%) were found gasping and/or cyanotic, others were found dead.

<sup>3</sup>These mice were small, with tight skin and joint contractures, and died before 14 days of age.

<sup>4</sup>These mice were viable, fertile and most were indistinguishable from WT littermates. A few *Adamtsl2*+/- mice were small, with variably tight skin and excess collagen deposition around bronchi.

**Supplemental Table S2. Primers used for genotyping and qRT-PCR**

| <b>Primer</b>              | <b>Sequence (5'-3')</b>  | <b>Application</b> |
|----------------------------|--------------------------|--------------------|
| <i>Adamtsl2</i> WT F       | GTACCAGCTCTGCAGAGTGC     | Genotyping         |
| <i>Adamtsl2</i> WT R       | AAGCTCCTCCCATCCGGTGG     | Genotyping         |
| <i>Adamtsl2</i> KO F       | AGCTGCGTGTTGTCTCCCC      | Genotyping         |
| <i>Adamtsl2</i> KO R       | CACTGAGTCTCTGGCATCTC     | Genotyping         |
| <i>Adamtsl2</i> Exon2/3 F  | GCTGTAGCAGTTGTGGCT       | qRT-PCR            |
| <i>Adamtsl2</i> Exon2/3 R  | CCTCTAGGCTGTTGGATGTG     | qRT-PCR            |
| <i>Adamtsl2</i> Exon 8/9 F | CCAGATTGTGGAGAGGAAGAAG   | qRT-PCR            |
| <i>Adamtsl2</i> Exon 8/9 R | GTCCACTTTGTAGTTGCCATTG   | qRT-PCR            |
| <i>Fbn1</i> F              | GCCAGAAAGGGTACATCGG      | qRT-PCR            |
| <i>Fbn1</i> R              | ACACACCTCCCTCCGTT        | qRT-PCR            |
| <i>Fbn2</i> F              | GTGAAACCACACAGAAATGTGAA  | qRT-PCR            |
| <i>Fbn2</i> R              | GAACAGTCGCCAGTCTCAC      | qRT-PCR            |
| <i>Fn</i> F                | GTCTAGGCGAAGGCAATGG      | qRT-PCR            |
| <i>Fn</i> R                | CCTATAGGATGTCCGGGTGT     | qRT-PCR            |
| <i>Magp1</i> F             | CATCCACAAGCCTTGCAAAC     | qRT-PCR            |
| <i>Magp1</i> R             | CAGACAGTGCGGACACATATT    | qRT-PCR            |
| <i>Ltbpl</i> F             | GGTTATTTGCCATCTTCCGTGTA  | qRT-PCR            |
| <i>Ltbpl</i> R             | GAAATTTGGAGGGCACTGACA    | qRT-PCR            |
| <i>mHprt1</i> F            | GATCCATTCCCTATGACTGTAGAT | qRT-PCR            |
| <i>mHprt1</i> R            | AGATCATCTCCACCAATAACTT   | qRT-PCR            |
| <i>mGapd</i> F             | GTGCTGAGTATGTCGTGGAG     | qRT-PCR            |
| <i>mGapd</i> R             | GCGGAGATGATGACCCTTT      | qRT-PCR            |

**Supplemental Table S3. Antibodies used for immunostaining and western blotting**

| <i>Antibody</i>                     | <i>Host</i> | <i>Supplier</i>   | <i>Product number</i> | <i>Dilution</i> | <i>Application (Embedding)</i> | <i>Antigen retrieval</i> |
|-------------------------------------|-------------|-------------------|-----------------------|-----------------|--------------------------------|--------------------------|
| $\alpha$ -smooth muscle actin (SMA) | Ms          | Sigma             | A2547                 | 1:300           | IF (P)                         | -                        |
| pan-cytokeratin                     | Rab         | Dako              | Z0622                 | 1:200           | IF (P)                         | H/E                      |
| KDEL                                | Ms          | ENZO              | ADI-SPA-827           | 1:200           | IF (P)                         | H/E                      |
| Magp1                               | Rab         | -                 | -                     | 1:200           | IF (P)                         | H/E                      |
| fibronectin                         | Rab         | Millipore         | AB2033                | 1:200           | IF (P)                         | H/E                      |
| fibrillin-1                         | Rab         | -                 | -                     | 1:250           | IF (P, F)                      | H/E                      |
| fibrillin-2                         | Rab         | -                 | -                     | 1:300           | IF (P, F)                      | H/E                      |
| Lamp2                               | R           | Abcam             | ABL-93                | 1:200           | IF (F)                         | -                        |
| Ltp1-K                              | Rab         | -                 | -                     | 1:250           | IF (F)                         | -                        |
| GM130                               | Rab         | Abcam             | ab52649               | 1:250           | IF (P)                         | H/E                      |
| $\beta$ -tubulin-IV                 | Ms          | BioGENEX          | MU178-US              | 1:500           | IF (P)                         | - and H/E                |
| Col IV                              | Rab         | Rockland          | 600-401-106-.01       | 1:500           | IF (P)                         | proteinase K             |
| Phalloidin-FITC                     | -           | Life Technologies | F432                  | 1:500           | IF (F)                         | -                        |
| PKC $\zeta$                         | Ms          | Santa Cruz        | sc-17781              | 1:200           | IF (P)                         | -                        |
| ZO-2                                | Rab         | Santa Cruz        | sc-11448              | 1:200           | IF (P)                         | -                        |
| pSmad2                              | Rab         | Cell Signaling    | 3101                  | 1:600           | IHC (P)                        | H/E                      |
| phospho-histone H3                  | Rab         | Millipore         | 06-570                | 1:250           | IF                             | H/E                      |
| pSmad2                              | Rab         | Cell Signaling    | 3101                  | 1:1000          | WB                             | -                        |
| Smad2/3                             | Rab         | Cell Signaling    | 3102                  | 1:1000          | WB                             | -                        |
| pSmad1/5/8                          | Rab         | Millipore         | AB3848                | 1:500           | WB                             | -                        |
| Smad1                               | Ms          | Millipore         | 04-1100               | 1:1000          | WB                             | -                        |
| pErk1/2                             | Rab         | Cell Signaling    | 4376                  | 1:1000          | WB                             | -                        |
| Erk1                                | Rab         | Santa Cruz        | sc-94                 | 1:1000          | WB                             | -                        |
| pp38                                | Rab         | Cell Signaling    | 4511                  | 1:500           | WB                             | -                        |
| p38                                 | Rab         | Cell Signaling    | 9212                  | 1:1000          | WB                             | -                        |
| ADAMTSL2 (C3)                       | Rab         | GeneTex           | GTX102069             | 1:500           | WB                             | -                        |

*Ms*: mouse; *Rab*: rabbit; *R*: rat; *IF*: immunofluorescence, paraffin (P) or frozen (F) sections; *IHC*, immunohistochemistry; *ICC*: immunocytochemistry; *WB*: western blotting; *H/E*: 4 x 1.5 min at 50% power with 30 sec intermission in 10 mM citric acid, 2 mM EDTA, 0.05% Tween-20, pH 6.2, in a microwave oven; *Proteinase K*: 2 min incubation with 20 mg/ml proteinase K solution at room temperature

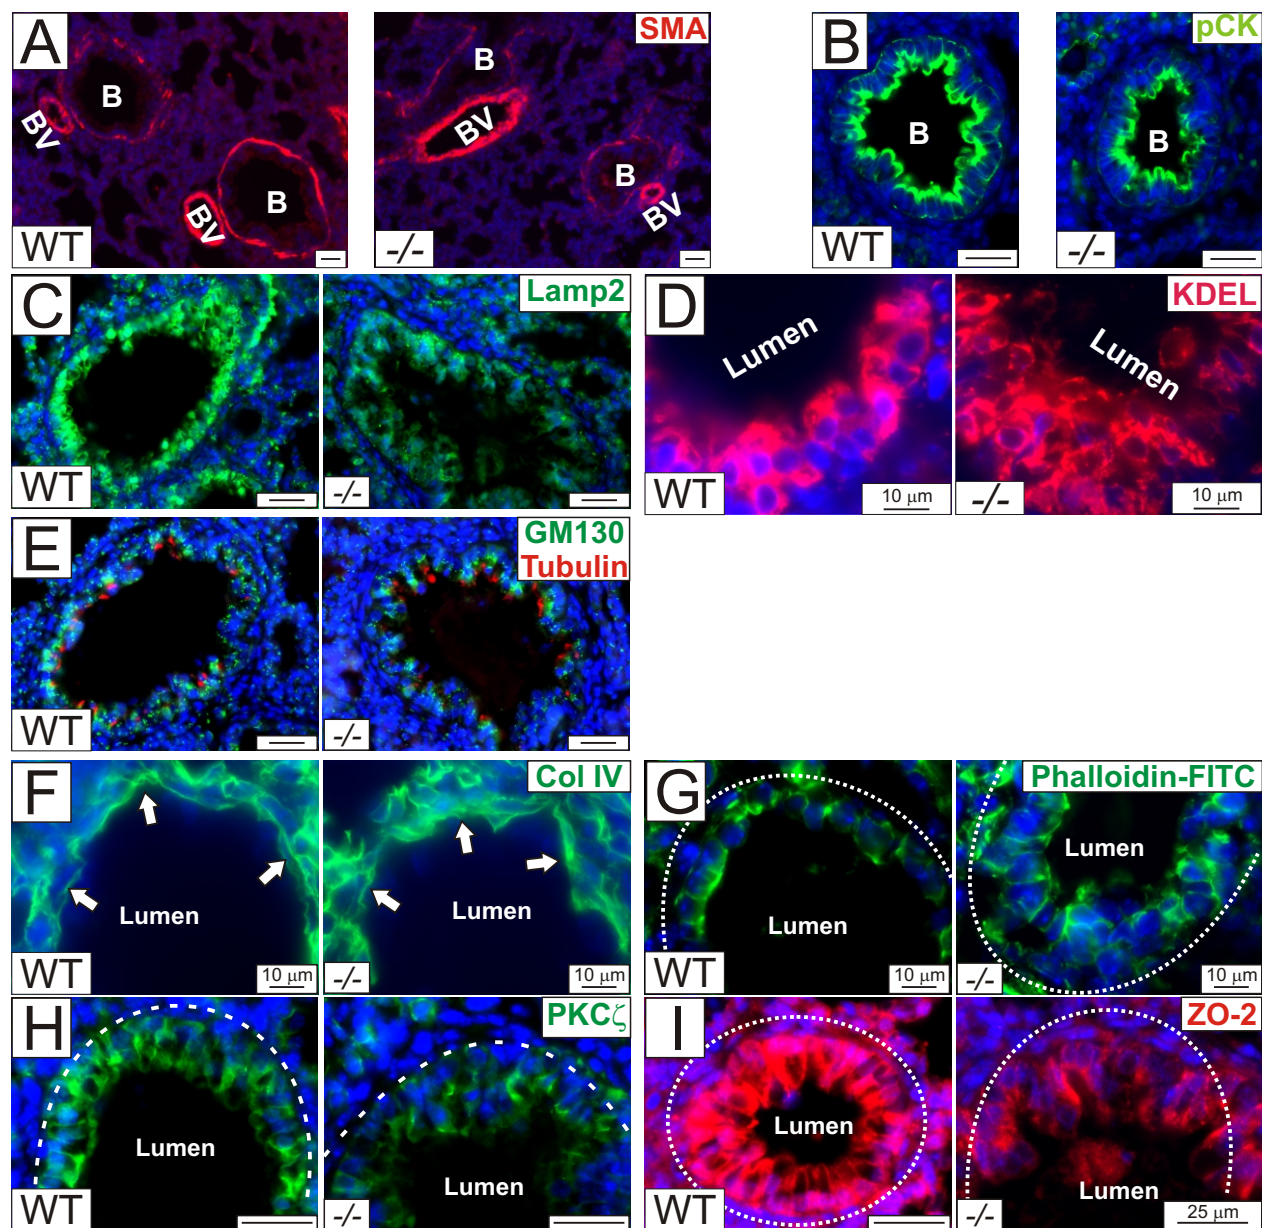

**Supplemental Figure S1**

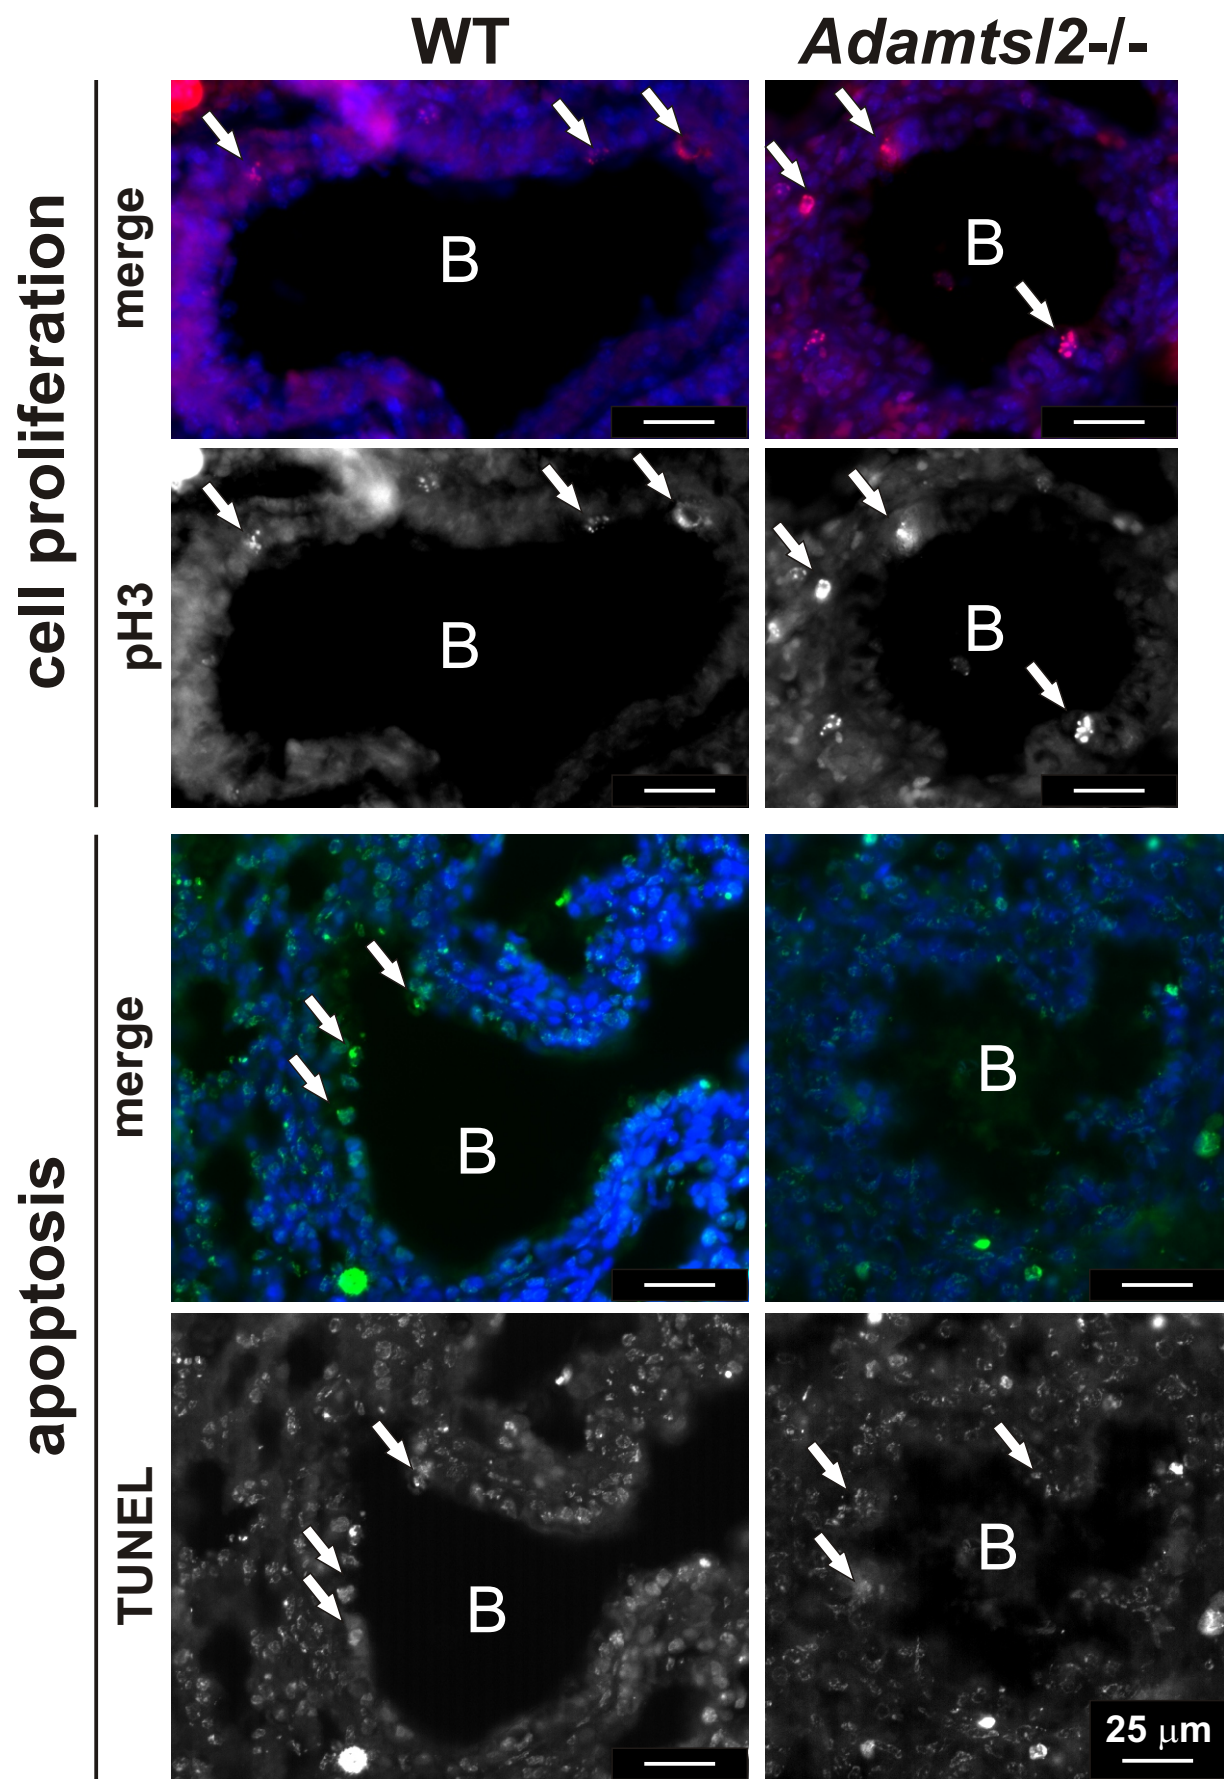

Supplemental Figure S2

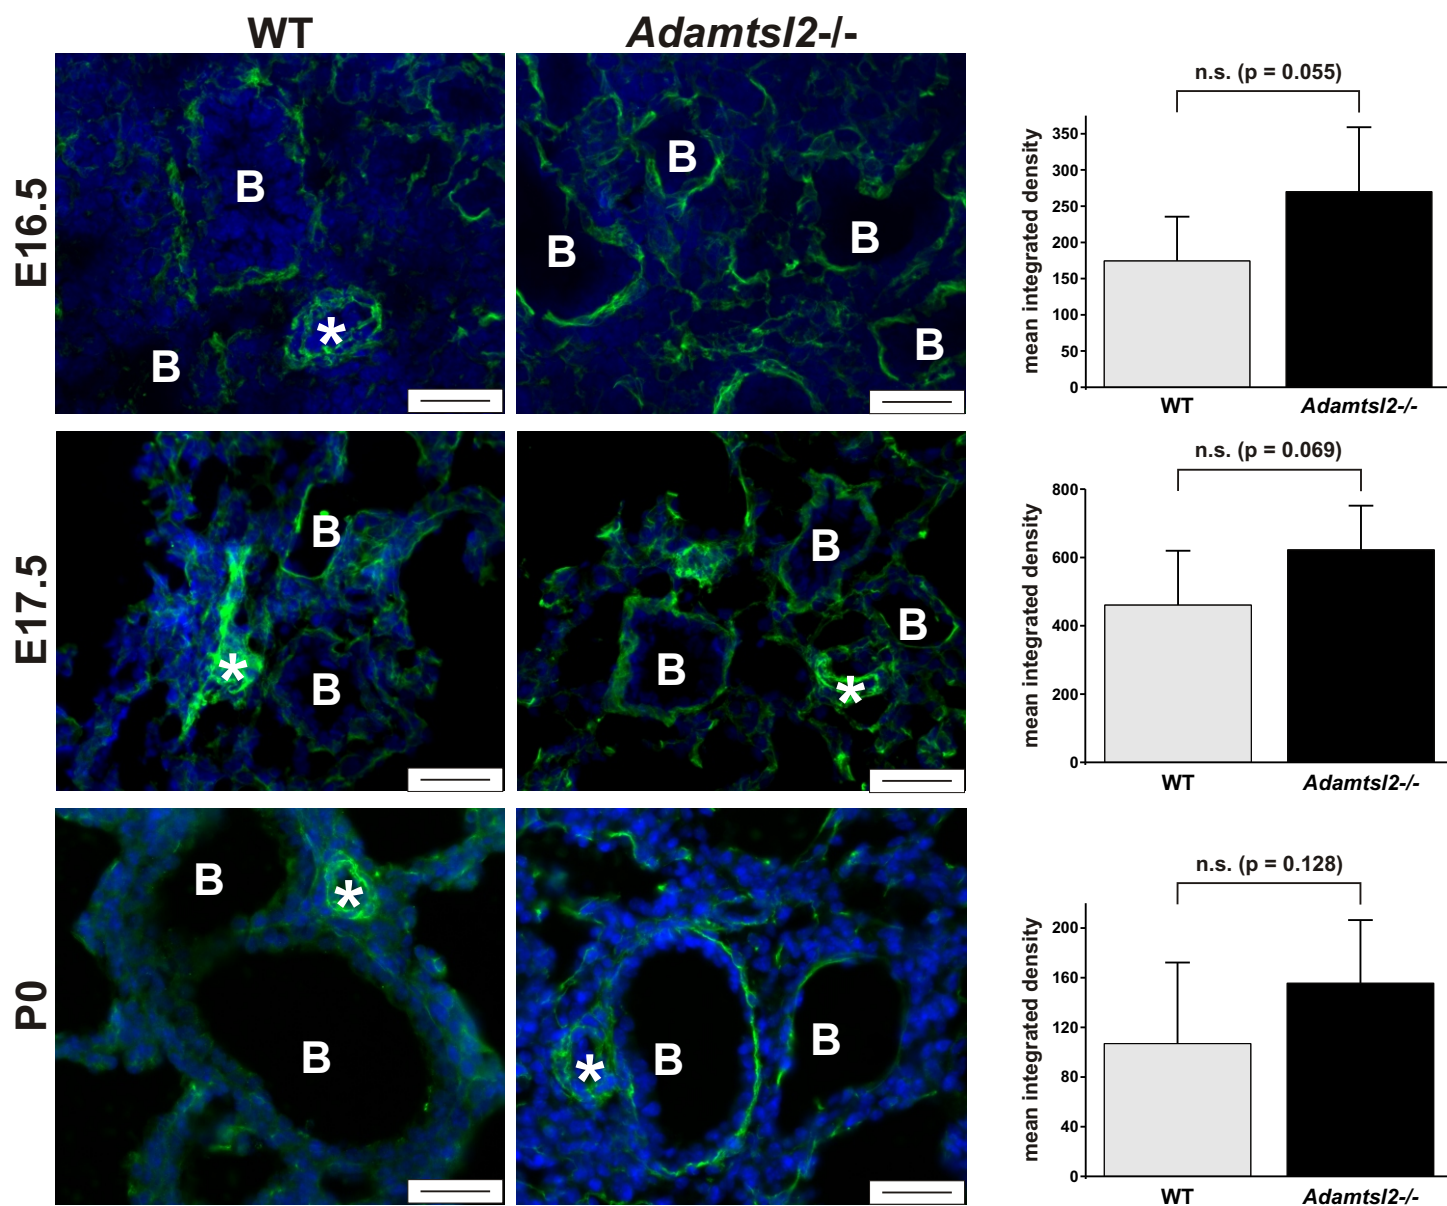

**Supplemental Figure S3**

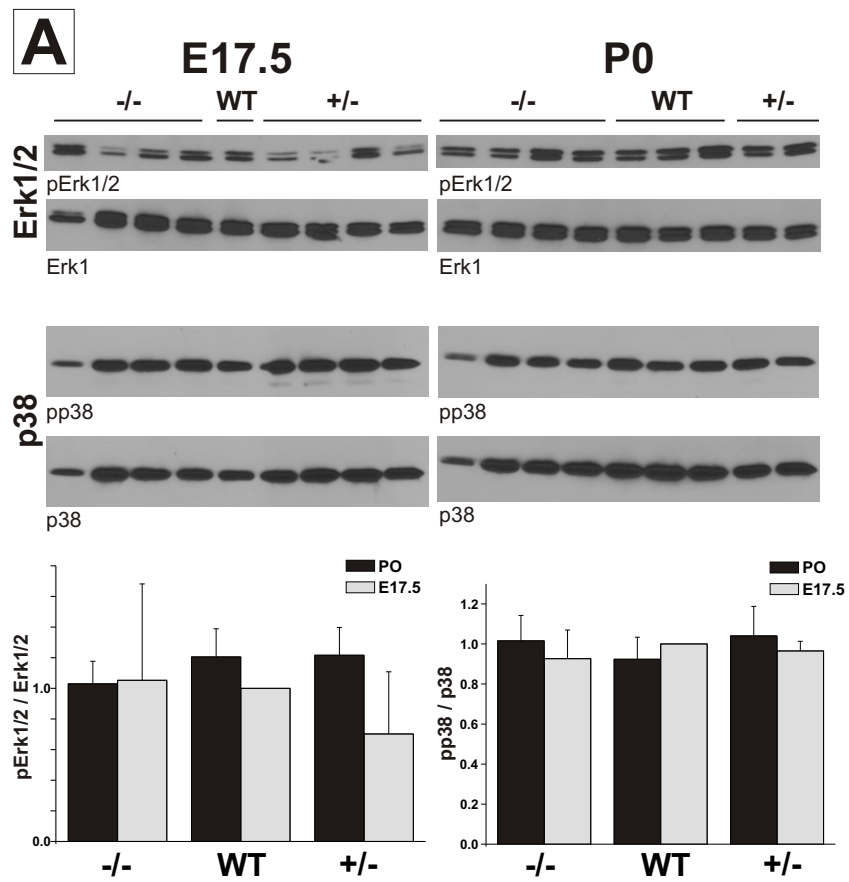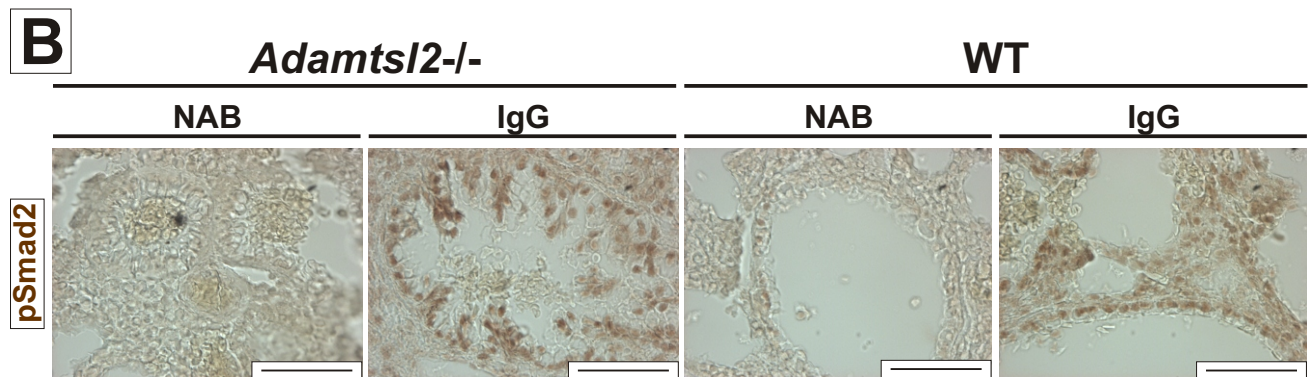

**Supplemental Figure S4**
